# Supplementary material
Source: Springer Nature journal article supplement (https://www.springermedizin.de/resource/supplementary/12888_2008_538_MOESM5_ESM.pdf/9483550)

**A**

### Validation of G72 primers using human genomic DNA

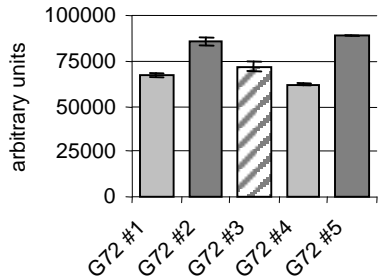**B**

### Validation of G72 primers using G72 cDNA, normalised to Cyclophilin

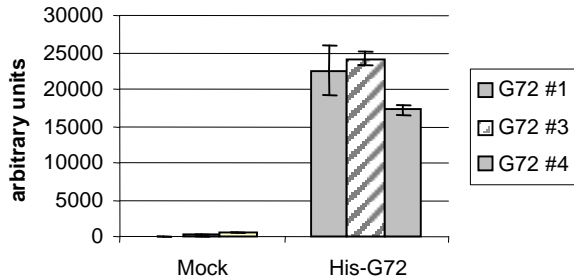

Supplement: MOESM5 [file 9483550]
